# Supplementary material for: Population Genetics and Anastomosis Group’s Geographical Distribution of Rhizoctonia solani Associated with Soybean
Source: MDPI journal article supplement (doi:10.3390/genes13122417), 2022-12-19
Supplement: s1 [file s1]

Supplementary Tables

**Table S1.** GenBank accession numbers of DNA sequences from the rDNA ITS1-5.8S-ITS2 region of *R. solani* AG were used to determine AG's phylogenetic relationships and genetic diversity associated with soybean.

| S. no. | AG/AG subgro up | Accessio n no. | Isolate      | Pathogenic ity                      | Geograph ic origin | Reference |
|--------|-----------------|----------------|--------------|-------------------------------------|--------------------|-----------|
| 1      | AG1-IA          | AF354060       | 1Rs          | Foliar blight                       | USA                | [37]      |
| 2      | AG5             | AF354078       | 10Rs         | Damping off                         | Japan              | “         |
| 3      | AG5             | KX118386       | USA_AG-5     | Damping-off, root and hypocotyl rot | USA                | [5]       |
| 4      | AG3             | KX118385       | USA_AG-3     | “                                   | USA                | “         |
| 5      | AG7             | KX118384       | ST81548      | “                                   | USA                | “         |
| 6      | AG11            | KX118382       | SP_19b       | “                                   | USA                | “         |
| 7      | AG11            | KX118381       | SP_19a       | “                                   | USA                | “         |
| 8      | AG5             | KX118377       | Rh0911029    | “                                   | USA                | “         |
| 9      | AG2-1           | KX118376       | Rh051324     | “                                   | USA                | “         |
| 10     | AG2-1           | KX118375       | Rh051307     | “                                   | USA                | “         |
| 11     | AG2-2IIIB       | KX118373       | PDONS_13_8_1 | “                                   | Canada             | “         |
| 12     | AG2-2IIIB       | KX118372       | ONS02_18     | “                                   | Canada             | “         |
| 13     | AG11            | KX118367       | K_4_18b      | “                                   | USA                | “         |
| 14     | AG2-1           | KX118363       | KARS02_5_1   | “                                   | USA                | “         |
| 15     | AG7             | KX118362       | KARS02_2_5   | “                                   | USA                | “         |
| 16     | AG7             | KX118361       | KARS02_1_9   | “                                   | USA                | “         |
| 17     | AG7             | KX118360       | KARS02_1_8   | “                                   | USA                | “         |
| 18     | AG7             | KX118359       | KARS02_1_6   | “                                   | USA                | “         |
| 19     | AG11            | KX118358       | KARS02_1_20  | “                                   | USA                | “         |
| 20     | AG11            | KX118356       | KARS02_1_11  | “                                   | USA                | “         |
| 21     | AG11            | KX118355       | HPIN22A      | “                                   | USA                | “         |
| 22     | AG7             | KX118354       | EV_7         | “                                   | USA                | “         |
| 23     | AG4-HGI         | KX118353       | EV_6         | “                                   | USA                | “         |
| 24     | AG4-HGI         | KX118352       | EV_3         | “                                   | USA                | “         |
| 25     | AG7             | KX118351       | EV_19        | “                                   | USA                | “         |
| 26     | AG2-2IIIB       | KX118350       | ER_4         | “                                   | USA                | “         |
| 27     | AG2-2IIIB       | KX118349       | ER_2         | “                                   | USA                | “         |
| 28     | AG2-2IIIB       | KX118348       | ER_19b       | “                                   | USA                | “         |
| 29     | AG2-2IIIB       | KX118347       | ER_19a       | “                                   | USA                | “         |
| 30     | AG2-2IIIB       | KX118346       | ER_15        | “                                   | USA                | “         |
| 31     | AG2-2IIIB       | KX118345       | DK_8         | “                                   | USA                | “         |

|    |            |          |               |                           |        |      |
|----|------------|----------|---------------|---------------------------|--------|------|
| 32 | AG2-2IIIB  | KX118344 | DK_11         | “                         | USA    | “    |
| 33 | AG3        | KX118343 | Cfar_500_6    | “                         | USA    | “    |
| 34 | AG3        | KX118342 | Cfar_500_3    | “                         | USA    | “    |
| 35 | AG3        | KX118341 | Cfar_500_10a  | “                         | USA    | “    |
| 36 | AG3        | KX118340 | Cfar_500_1    | “                         | USA    | “    |
| 37 | AG4-HGIII  | KX118339 | BVT_3         | “                         | USA    | “    |
| 38 | AG4-HGIII  | KX118338 | BVT_28        | “                         | USA    | “    |
| 39 | AG7        | KX118337 | BVT_20        | “                         | USA    | “    |
| 40 | AG11       | KX118336 | BVT_18        | “                         | USA    | “    |
| 41 | AG7        | KX118335 | BVT_16        | “                         | USA    | “    |
| 42 | AG2-2IIIB  | KX118334 | 65L-2         | “                         | USA    | “    |
| 43 | AG4-HGIII  | KX118331 | AG-4_Carling  | “                         | USA    | “    |
| 44 | AG4-HGIII  | KX118330 | AG-4_Nelson   | “                         | USA    | “    |
| 45 | AG4-HGIII  | KX118329 | Rh051339      | “                         | USA    | “    |
| 46 | AG2-2      | KX118328 | AG2-2_Nelson  | “                         | USA    | “    |
| 47 | AG2-2-IIIB | KX118397 | X42210_b      | “                         | USA    | “    |
| 48 | AG3        | KX118396 | X248_3bKH     | “                         | USA    | “    |
| 49 | AG11       | KX118394 | X12SDSa       | “                         | USA    | “    |
| 50 | AG2-2IIIB  | KX118392 | X12Rs41       | “                         | USA    | “    |
| 51 | AG2-2IIIB  | KX118391 | WONS_13_8_5   | “                         | USA    | “    |
| 52 | AG2-2IIIB  | KX118390 | WONS_13_1_2_3 | “                         | USA    | “    |
| 53 | AG-1       | JF701709 | RAPS3         | Web/foliar blight/wet rot | India  | [68] |
| 54 | AG2-3      | FJ435110 | CSL1934       | Damping off               | Japan  | [44] |
| 55 | AG2-3      | FJ435099 | CSL1866       | Damping off               | Japan  | “    |
| 56 | AG7        | AF153793 | Roth32        | none                      | USA    | [77] |
| 57 | AG11       | AF354115 | Roth24        |                           | USA    | [78] |
| 58 | AG11       | AF354114 | Roth16        |                           | USA    | “    |
| 59 | AG5        | AF354112 | 19Rs          |                           | Japan  | “    |
| 60 | AG4        | AF354081 | BN38          |                           | USA    | “    |
| 61 | AG1-IA     | DQ173075 | SJ142-2       | Leaf blight               | Brazil | [33] |
| 62 | AG1-IA     | DQ173074 | SJ140         | “                         | Brazil | “    |
| 63 | AG1-IA     | DQ173073 | SJ134         | “                         | Brazil | “    |
| 64 | AG1-IA     | DQ173072 | SJ133         | “                         | Brazil | “    |
| 65 | AG1-IA     | DQ173071 | SJ129         | “                         | Brazil | “    |
| 66 | AG1-IA     | DQ173070 | SJ127         | “                         | Brazil | “    |
| 67 | AG1-IA     | DQ173069 | SJ121         | “                         | Brazil | “    |

|    |               |              |               |                  |        |      |
|----|---------------|--------------|---------------|------------------|--------|------|
| 68 | AG1-IA        | DQ17306<br>8 | SJ093         | “                | Brazil | “    |
| 69 | AG1-IA        | DQ17306<br>7 | SJ080         | “                | Brazil | “    |
| 70 | AG1-IA        | DQ17306<br>6 | SJ064         | “                | Brazil | “    |
| 71 | AG1-IA        | DQ17306<br>5 | SJ053         | “                | Brazil | “    |
| 72 | AG1-IA        | DQ17306<br>4 | SJ048         | “                | Brazil | “    |
| 73 | AG1-IA        | DQ17306<br>3 | SJ047         | “                | Brazil | “    |
| 74 | AG1-IA        | DQ17306<br>2 | SJ044         | “                | Brazil | “    |
| 75 | AG1-IA        | DQ17306<br>1 | SJ040         | “                | Brazil | “    |
| 76 | AG1-IA        | DQ17306<br>0 | SJ036         | “                | Brazil | “    |
| 77 | AG1-IA        | DQ17305<br>9 | SJ031-6       | “                | Brazil | “    |
| 78 | AG1-IA        | DQ17305<br>8 | SJ031-5       | “                | Brazil | “    |
| 79 | AG1-IA        | DQ17305<br>7 | SJ023         | “                | Brazil | “    |
| 80 | AG1-IA        | DQ17305<br>6 | SJ021         | “                | Brazil | “    |
| 81 | AG1-IA        | DQ17305<br>5 | SJ015         | “                | Brazil | “    |
| 82 | AG1-IA        | DQ17305<br>4 | SJ014-2       | “                | Brazil | “    |
| 83 | AG1-IA        | DQ17305<br>3 | SJ013         | “                | Brazil | “    |
| 84 | AG1-IC        | DQ17307<br>7 | AG-1 IC       | “                | USA    | “    |
| 85 | AG1-IB        | DQ17307<br>6 | AG-1IB        | “                | USA    | “    |
| 86 | AG1-IA        | DQ17305<br>2 | Rhs-9F1       | “                | Brazil | “    |
| 87 | AG1-IA        | DQ17305<br>1 | Rhs-4F1       | “                | Brazil | “    |
| 88 | AG1-IA        | DQ17305<br>0 | Rhs-3F6       | “                | Brazil | “    |
| 89 | AG1-IA        | DQ17304<br>9 | Rhs-3F1       | “                | Brazil | “    |
| 90 | AG1-IA        | DQ17304<br>8 | AG1IArJ       | “                | Japan  | “    |
| 91 | AG1-IA        | DQ17304<br>7 | AG1IAmJ       | “                | Japan  | “    |
| 92 | AG4-<br>HGII  | AY270005     | Not available | Hypocotyl<br>rot | Brazil | [32] |
| 93 | AG2-<br>2IIIB | AY270015     | SJ07          |                  | Brazil | [78] |
| 94 | AG1-IA        | AY270013     | SJ19          | Foliar<br>blight | Brazil | [32] |
| 95 | AG1-IA        | AY270012     | SJ57          | Foliar<br>blight | Brazil | “    |
| 96 | AG1-IA        | AY270011     | SJ67          | Foliar<br>blight | Brazil | “    |
| 97 | AG1-IA        | AY270010     | SJ16          | Foliar<br>blight | Brazil | “    |
| 98 | AG1-IA        | AY270009     | SJ26          | Foliar<br>blight | Brazil | “    |

|     |          |          |              |                |        |             |
|-----|----------|----------|--------------|----------------|--------|-------------|
| 99  | AG1-IA   | AY270008 | SJ24         | Foliar blight  | Brazil | “           |
| 100 | AG1-IA   | AY270007 | SJ34         | Foliar blight  | Brazil | “           |
| 101 | AG1-IA   | AY270006 | SJ28         | Foliar blight  | Brazil | “           |
| 102 | AG4-HGII | AY270004 | SJ03         | Hypocotyle rot | Brazil | “           |
| 103 | AG4-HGII | AY270003 | SJ02         | Hypocotyle rot | Brazil | “           |
| 104 | AG4-HGII | AY270002 | SJ05         | Hypocotyle rot | Brazil | “           |
| 105 | AG4-HGII | AY270001 | SJ01         | Hypocotyle rot | Brazil | “           |
| 106 | AG-7     | MW410857 | Unknown      | Damping off    | Taiwan | [42]        |
| 107 | AG-7     | MW410858 | Unknown      | Damping off    | Taiwan | [42]        |
| 108 | AG-1 IF  | MK734418 | Unknown      | Foliar blight  | Brazil | [64]        |
| 109 | AG-9     | KX118333 | AG-9_Carling | Unknown        | USA    | [5]         |
| 110 | AG-6     | KX118332 | AG-6_Carling | Unknown        | USA    | [5]         |
| 111 | AG-1-IB  | KY172991 | ppj-3        | Unknown        | India  | Unpublished |
| 112 | AG-1-IB  | JQ911746 | AG_1-IB      | Unknown        | India  | Unpublished |
| 113 | AG-2-3   | U57742   | 23R03        | Unknown        | Japan  | Unpublished |
| 114 | AG-2-3   | U57741   | 23R02        | Unknown        | Japan  | Unpublished |
| 115 | AG-2-3   | U57740   | 23R01        | Unknown        | Japan  | Unpublished |

---
